# Supplementary material for: KIF23 is an independent prognostic biomarker in glioma, transcriptionally regulated by TCF-4
Source: PubMed Central journal article supplement (PMC5029730; doi:10.18632/oncotarget.8261), 2016-03-22
Supplement: oncotarget-07-24646-s001.pdf [file oncotarget-07-24646-s001.pdf]

## SUPPLEMENTARY FIGURE AND TABLES

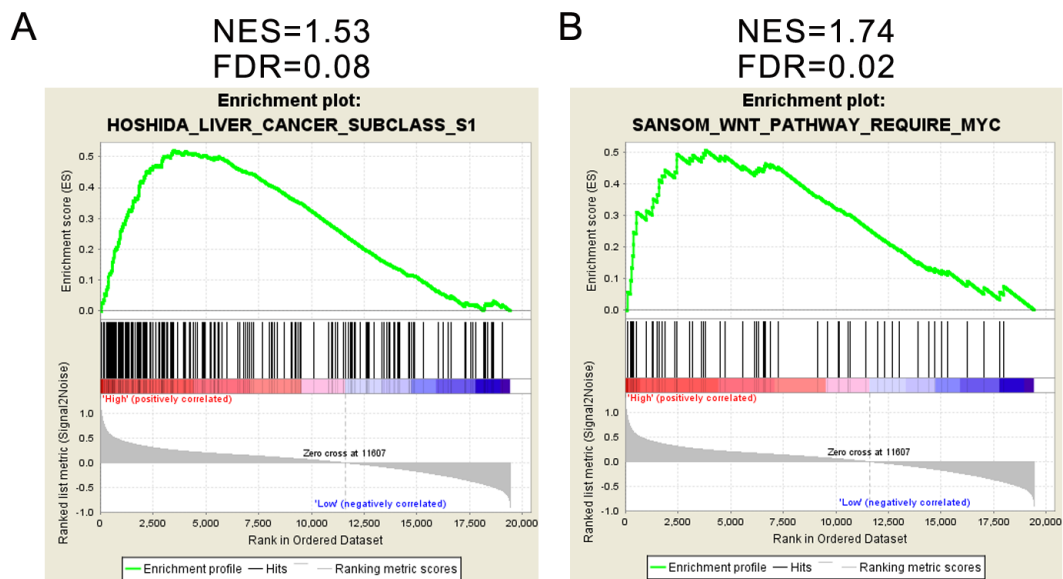

Genes from 'subtype S1' signature of hepatocellular carcinoma (HCC): aberrant activation of the WNT signaling pathway.

Wnt target genes up-regulated after Cre-lox knockout of APC in the small intestine that require functional MYC

**Supplementary Figure S1: The expression of KIF23 was tightly associated with wnt pathway activity.** GSEA was applied to CGGA microarray dataset with two wnt pathway activity associated with gene sets.

**Supplementary Table S1: KIF23 correlated genes.**

See Supplementary File 1

**Supplementary Table S2: Cell cycle associated genes of KIF23 correlated genes.**

See Supplementary File 2
